# Supplementary material for: High intensity interval training as a novel treatment for impaired awareness of hypoglycaemia in people with type 1 diabetes (HIT4HYPOS): a randomised parallel-group study
Source: PubMed Central journal article supplement (PMC10789679; doi:10.1007/s00125-023-06051-x), 2023-11-27

**ESM Table 1:** Participant heart rate (HR) data. Baseline pre VO<sub>2</sub> Peak test, Target HR (90% Maximum obtained during VO<sub>2</sub> Peak test), Maximum HR reached during each HIT session. All data in bpm.

|           | RESTING HR | MAX HR DURING VO <sub>2</sub> PEAK TEST | 90% MAX HR | PEAK HR PER HIT SESSION |     |     |     |     |     |     |     |     |     |     |     |
|-----------|------------|-----------------------------------------|------------|-------------------------|-----|-----|-----|-----|-----|-----|-----|-----|-----|-----|-----|
|           |            |                                         |            | 1                       | 2   | 3   | 4   | 5   | 6   | 7   | 8   | 9   | 10  | 11  | 12  |
| <b>01</b> | 80         | 182                                     | 164        | 183                     | 183 | 182 | 179 | 185 | 181 | 186 | 179 | 179 | 184 | 176 | 177 |
| <b>03</b> | 66         | 183                                     | 165        | 175                     | 171 | 173 | 172 | 171 | 173 | 171 | 170 | 170 | 169 | 171 | 170 |
| <b>06</b> | 89         | 200                                     | 180        | 193                     | 192 | 188 | 185 | 186 | 188 | 184 | 185 | 188 | 187 | 186 | 184 |
| <b>08</b> | 89         | 175                                     | 158        | 171                     | 171 | 168 | 172 | 166 | 168 | 165 | 167 | 164 | 166 | 169 | 165 |
| <b>09</b> | 73         | 170                                     | 153        | 169                     | 162 | 165 | 158 | 162 | 157 | 178 | 159 | 157 | 158 | 157 | 156 |
| <b>12</b> | 44         | 171                                     | 154        | 176                     | 173 | 171 | 174 | 166 | 222 | 164 | 164 | 164 | 163 | 168 | 167 |
| <b>16</b> | 86         | 163                                     | 147        | 161                     | 163 | 156 | 158 | 156 | 158 | 158 | 161 | 154 | 160 | 157 | 156 |
| <b>20</b> | 87         | 171                                     | 154        | 163                     | 160 | 159 | 157 | 157 | 156 | 157 | 157 | 157 | 160 | 157 | 159 |
| <b>22</b> | 71         | 173                                     | 156        | 178                     | 171 | 172 | 172 | 174 | 169 | 177 | 170 | 170 | 169 | 168 | 175 |

**ESM Table 2.** Continuous glucose monitoring measures during 4-week HIIT+CGM and control CGM-alone study conditions.

| <b>Metric (unit)</b>  | <b>CGM</b>   | <b>HIIT+CGM</b> | <b>p-value</b> |
|-----------------------|--------------|-----------------|----------------|
| $T_{Hypo}$ (%)        | 3.12 [0.70]  | 2.17 [0.49]     | 0.280          |
| $T_{Hypo(L1)}$ (%)    | 2.65 [0.58]  | 1.92 [0.45]     | 0.333          |
| $T_{Hypo(L2)}$ (%)    | 0.48 [0.15]  | 0.25 [0.07]     | 0.191          |
| $T_{Hyper}$ (%)       | 32.63 [3.95] | 36.63 [3.28]    | 0.447          |
| $T_{Hyper(L1)}$ (%)   | 25.42 [2.78] | 26.06 [1.98]    | 0.855          |
| $T_{Hyper(L2)}$ (%)   | 7.21 [1.42]  | 10.57 [2.14]    | 0.209          |
| $T_{Target}$ (%)      | 64.24 [3.60] | 61.20 [3.20]    | 0.536          |
| $T_{TightTarget}$ (%) | 39.62 [4.03] | 36.78 [2.82]    | 0.571          |

**ESM Table 3.** Symptom responses and cognitive function assessments during all hyperinsulinaemic hypoglycaemic clamps studies. Table shows mean (SEM) values under euglycaemic (0 min) and hypoglycaemic (90min) conditions at baseline and after the 4-week intervention in RT-CGM and RT-CGM+HIIT cohorts.

|                                                | <b>Baseline<br/>RT-CGM</b> | <b>Post<br/>RT-CGM</b> | <b>Baseline<br/>RT-CGM+HIIT</b> | <b>Post<br/>RT-CGM+HIIT</b> |
|------------------------------------------------|----------------------------|------------------------|---------------------------------|-----------------------------|
| Mean (SEM) Responses During Hypoglycaemia      |                            |                        |                                 |                             |
| <b>Symptoms- Edinburgh Hypoglycaemia Score</b> |                            |                        |                                 |                             |
| <b>Total</b>                                   |                            |                        |                                 |                             |
| 0 min                                          | 16 [1]                     | 16 [2]                 | 16 [3]                          | 15 [1]                      |
| 90 min                                         | 25 [3]                     | 20 [2]                 | 27 [3]                          | 25 [2]                      |
| <b>Autonomic</b>                               |                            |                        |                                 |                             |
| 0min                                           | 7 [2]                      | 6 [1]                  | 6 [1]                           | 6 [0]                       |
| 90 min                                         | 13 [2]                     | 10 [1]                 | 12 [1]                          | 12 [1]                      |
| <b>Cognition</b>                               |                            |                        |                                 |                             |
| <b>Digit Symbol Substitution Test</b>          |                            |                        |                                 |                             |
| 0 min                                          | 52 [2]                     | 54 [3]                 | 45 [3]                          | 47 [4]                      |
| 90 min                                         | 43 [3]                     | 46 [3]                 | 38 [3]                          | 39 [3]                      |
| <b>4-Choice Reaction Time Test (ms)</b>        |                            |                        |                                 |                             |
| 0 min                                          | 534 [21]                   | 564 [19]               | 497 [14]                        | 537 [22]                    |
| 90 min                                         | 623 [20]                   | 634 [211]              | 591 [32]                        | 612 [24]                    |

**ESM Figure. 1:** Heart rate response to HIT. Heart rate (HR) at rest, circles; Target HR, squares; Maximum HR reached, triangles. Maximum HR is mean of all 12 sessions.  $n = 9$ , values are mean  $\pm$  SEM.

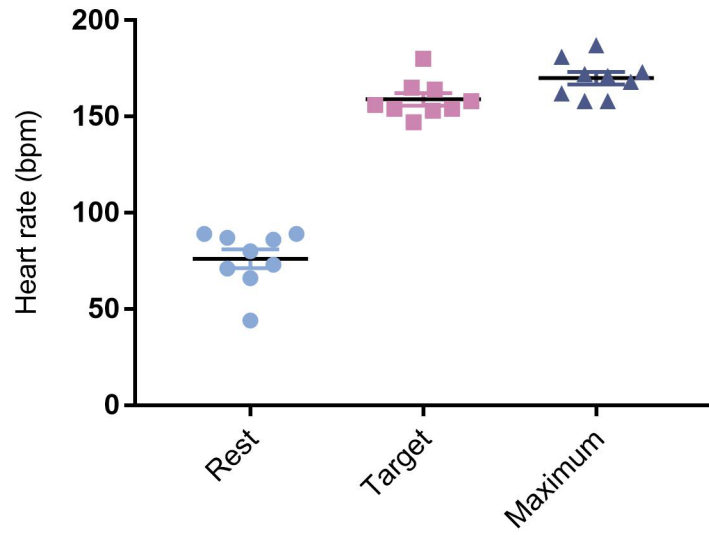

Supplement: 125_2023_6051_MOESM1_ESM.pdf [file 125_2023_6051_MOESM1_ESM.pdf]
